# Supplementary material
Source: MDPI journal article supplement (https://www.mdpi.com/2075-4701/11/4/668)
Supplement: s1 [file s1]

## *Supplementary Materials*

# **In-situ synchrotron X-ray micro-diffraction investigation of elastic strains in laminated Ti-Al composites**

**Tianbo Yu <sup>1,\*</sup>, Yan Du <sup>2</sup>, Guohua Fan <sup>3</sup>, Rozaliya Barabash <sup>4</sup>, Dorte Juul Jensen <sup>1</sup>, Yubin Zhang <sup>1</sup>**

<sup>1</sup> Department of Mechanical Engineering, Technical University of Denmark, DK-2800 Kgs. Lyngby, Denmark; tiyu@mek.dtu.dk

<sup>2</sup> Northwest Institute for Nonferrous Metal Research, Xi'an 710016, PR China; ydu\_mail@163.com

<sup>3</sup> Key Laboratory for Light-weight Materials, Nanjing Tech University, Nanjing 211816, PR China; ghfan@njtech.edu.cn

<sup>4</sup> The University of Tennessee, Knoxville, TN 37996, USA; rbarabas@utk.edu

\* Correspondence: tiyu@mek.dtu.dk

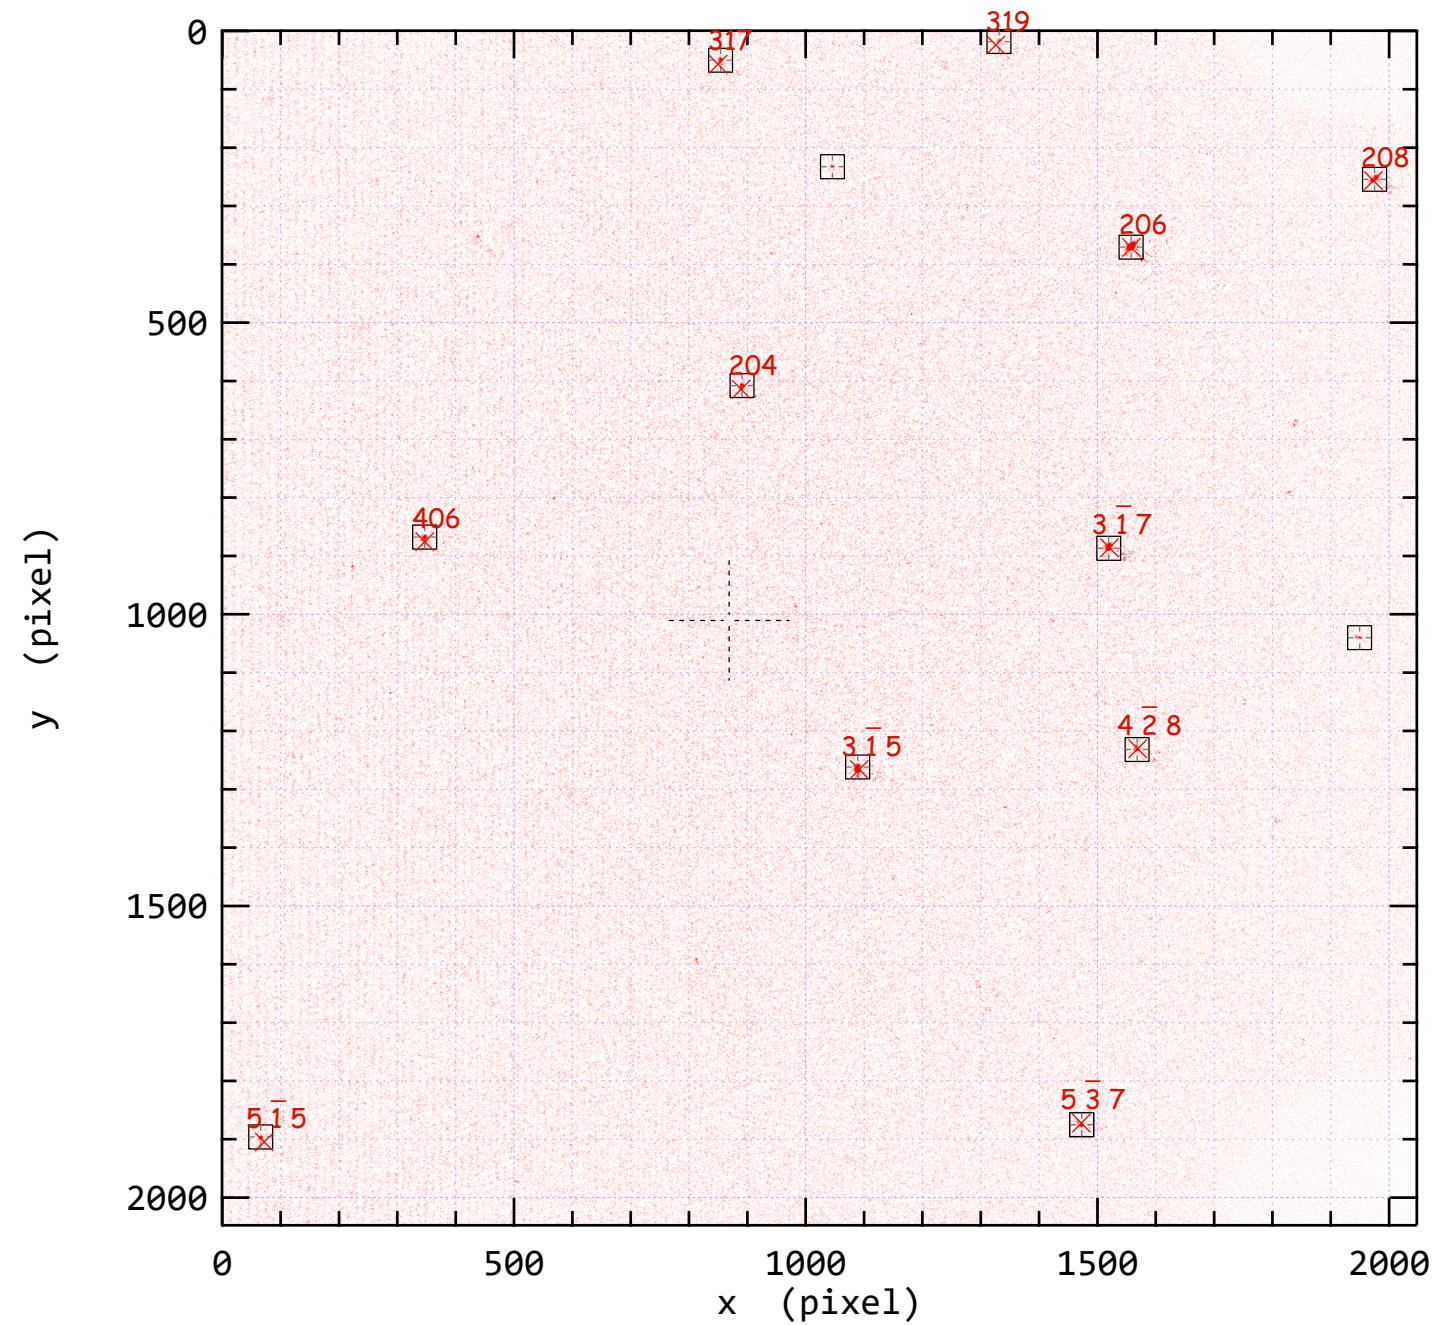

Figure S1. Example of depth-resolved diffraction pattern from the Al layer before tensile loading.



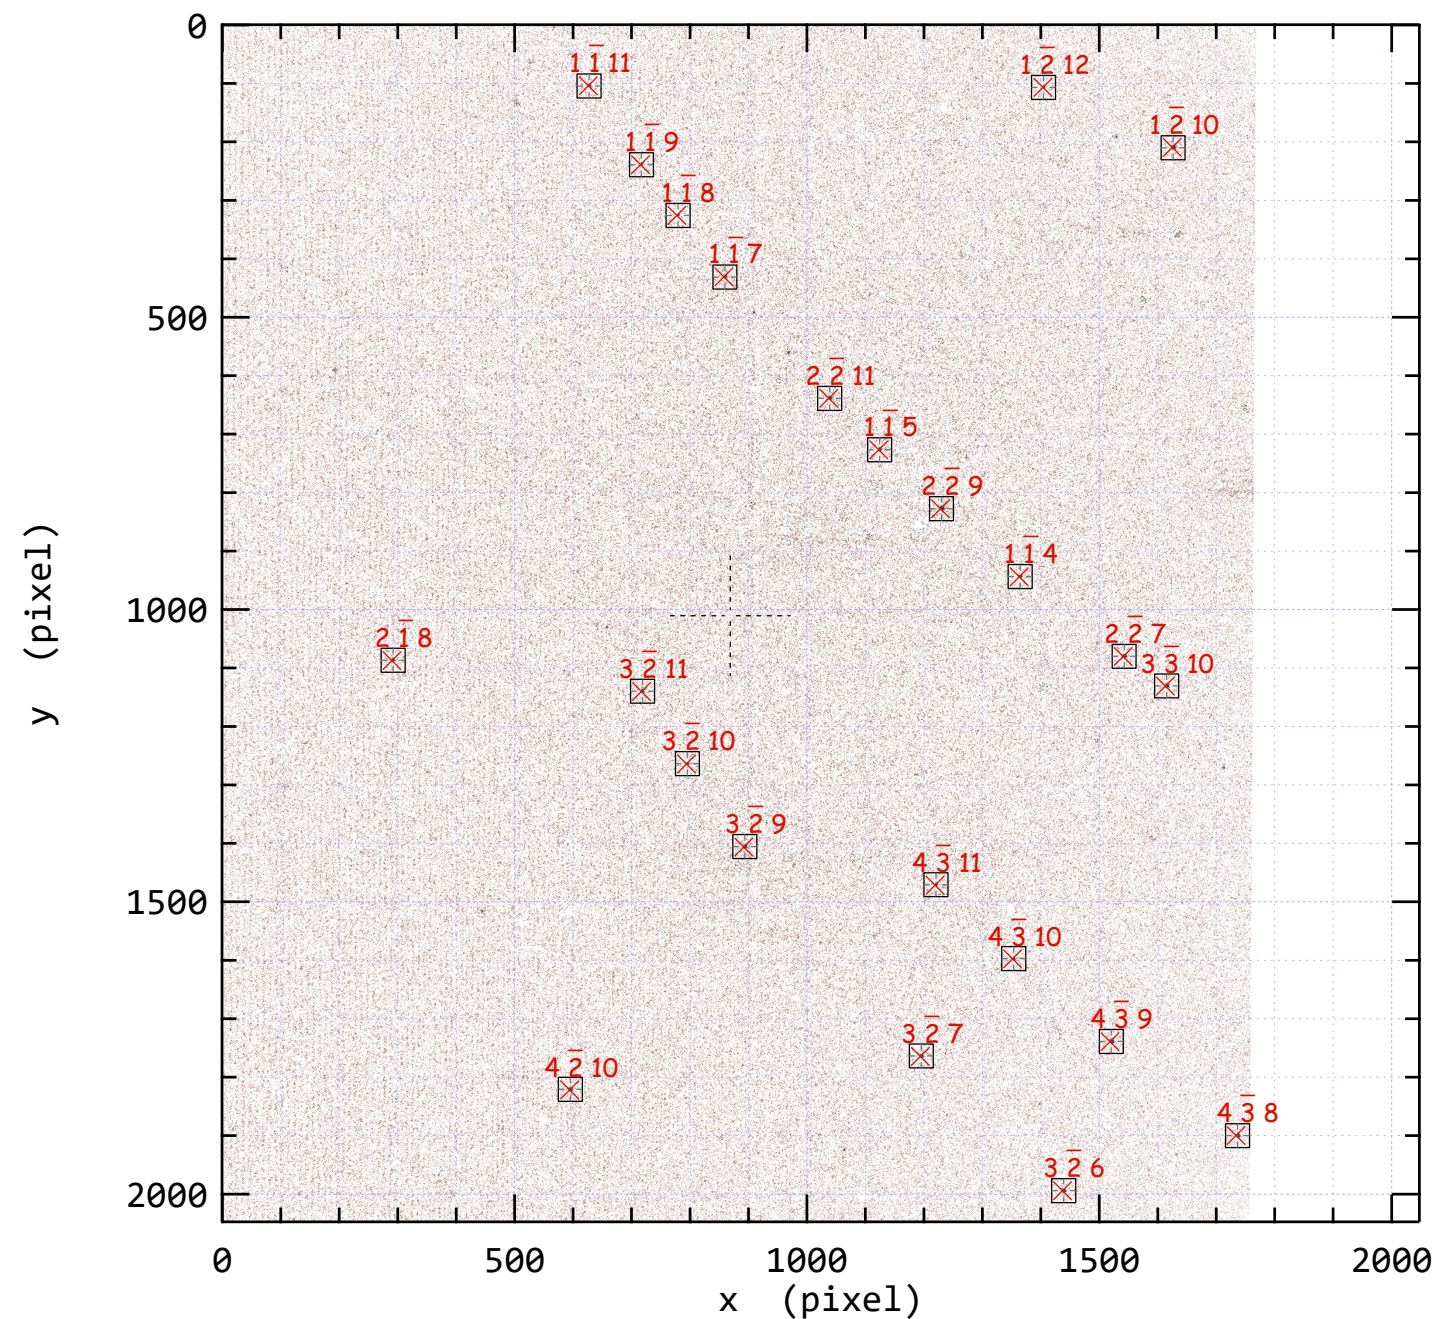

Figure S2. Example of depth-resolved diffraction pattern from an Ti grain below the Al layer before tensile loading.

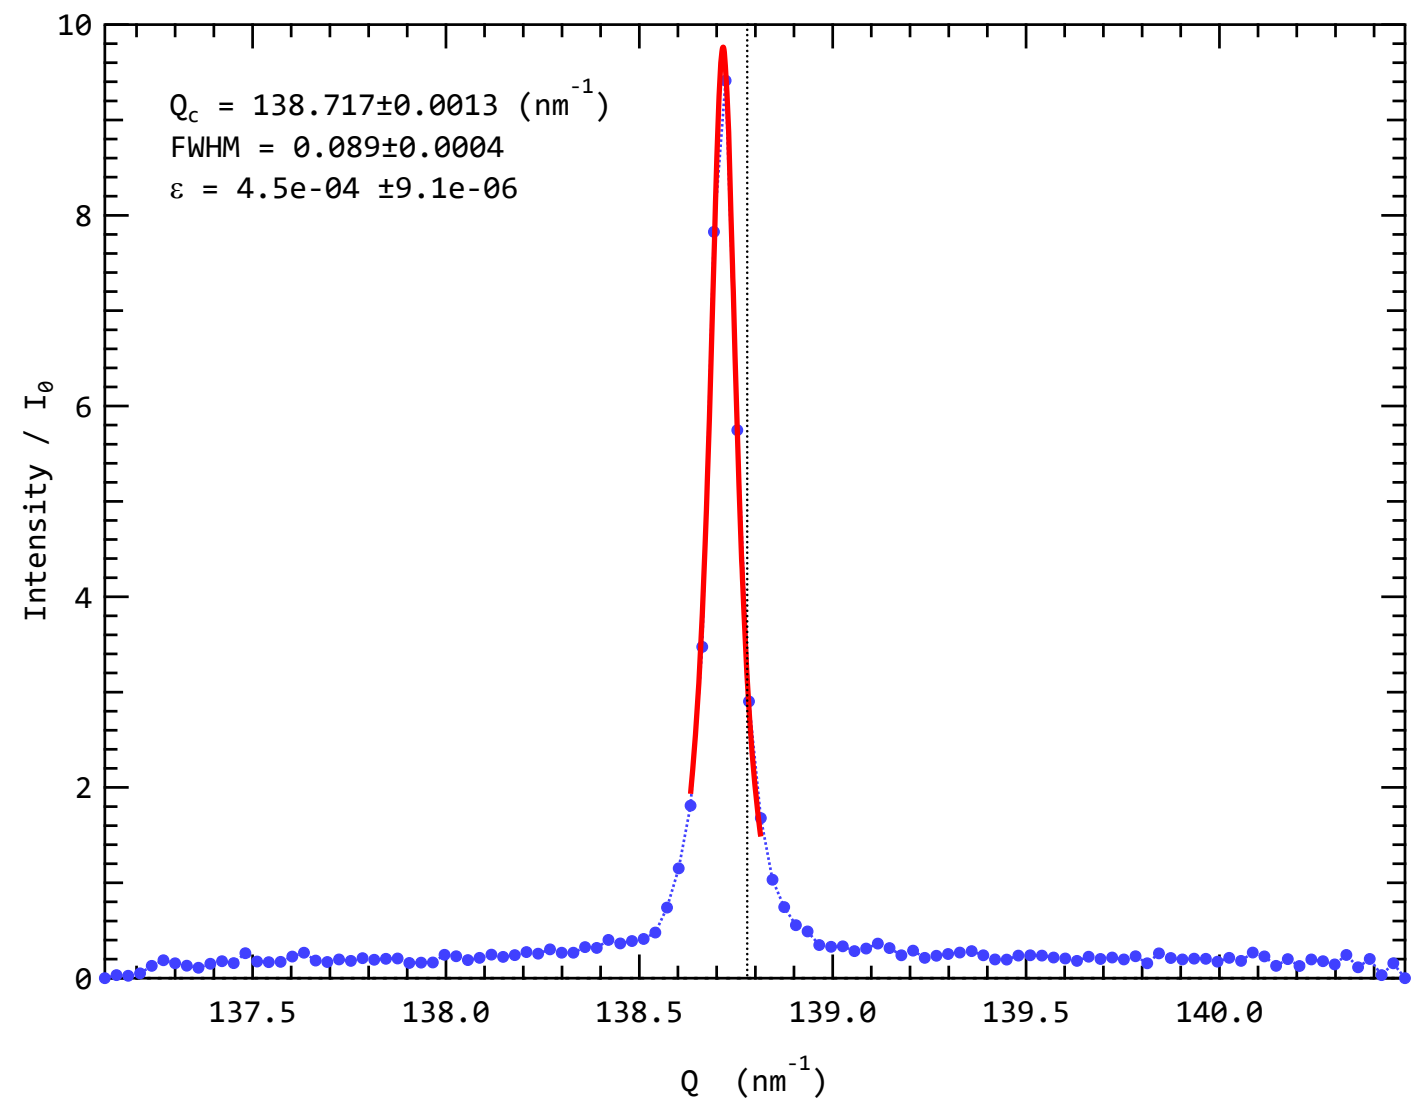

Figure S3. Example of diffraction intensity profile (fitted by a Gaussian function) of the energy scan in an Al voxel before tensile loading.

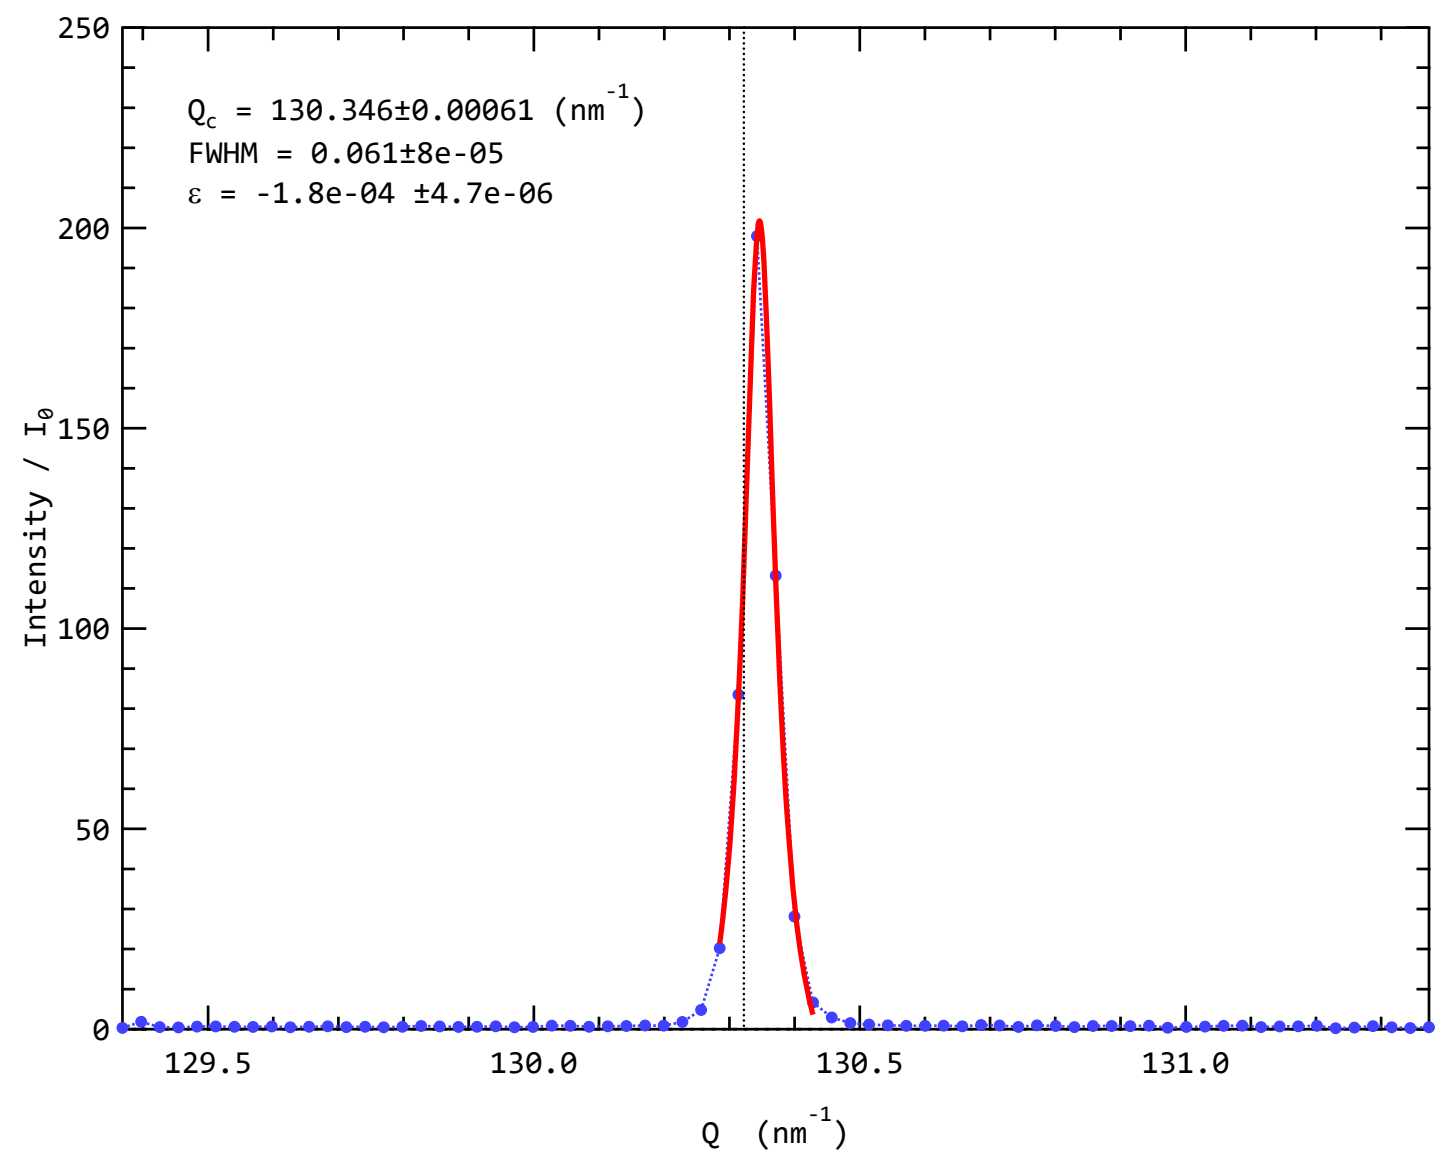

Figure S4. Example of diffraction intensity profile (fitted by a Gaussian function) of the energy scan in a Ti voxel before tensile loading.
